# Supplementary material
Source: publisher site journal article supplement (https://www.spandidos-publications.com/8658/downloadSupplementary)
Supplement: Supplementary file 1 [file downloadSupplementary]

## Sheet: Sheet1
Table SIII. SMR analysis on pQTL and GWAS datasets.
Outcome	probeID	ProbeChr	Gene	Probe_bp	topSNP	topSNP_chr	topSNP_bp	A1	A2	Freq	b_GWAS	se_GWAS	p_GWAS	b_eQTL	se_eQTL	p_eQTL	b_SMR	se_SMR	p_SMR	p_HEIDI	nsnp_HEIDI	lo_ci	up_ci	or	or_lci95	or_uci95	OR (95%CI)	FDR	nsnps	PP.H0.abf	PP.H1.abf	PP.H2.abf	PP.H3.abf	PP.H4.abf	PP.H4.abf_conditional	PP.H4.abf_1	PP.H4.abf_2
renal_carcinoma	SeqId_4125_52	6	AGER	32180968	rs2071285	6	32212654	T	A	0.0531697	-0.306102	0.0791844	0.000110776	-0.6681	0.020835	1.303869e-225	0.458168	0.11938	0.00012409	0.0105755	20	0.224183	0.692153	1.58117	1.2513	1.99801	1.581(1.251,1.998)	0.0232048	9043	5.85983e-218	0.0383326	9.3866e-218	0.0605021	0.901165	0.937086	0.961667	14.8948
renal_carcinoma	SeqId_3448_13	19	INSR	7112255	rs4804368	19	7190279	G	A	0.654397	-0.133678	0.0357998	0.000188434	0.0715	0.00885787	6.919999e-16	-1.86962	0.551675	0.000701505	0.0119921	20	-2.9509	-0.788337	0.154182	0.0522925	0.4546	0.154(0.052,0.455)	0.0655907	2611	1.22857e-11	0.0931379	4.27021e-12	0.0314971	0.875365	0.965268	0.906862	27.7919
renal_carcinoma	SeqId_17161_1	1	DDOST	20651767	rs818194	1	20605335	T	A	0.794479	0.14193	0.0435692	0.00112366	0.0829	0.00938802	1.043e-18	1.71207	0.560185	0.00224125	0.0133974	20	0.614107	2.81003	5.54042	1.84801	16.6105	5.54(1.848,16.61)	0.139705	1784	4.91424e-13	0.218943	9.77949e-14	0.0428322	0.738224	0.945161	0.781057	17.2353
renal_carcinoma	SeqId_2860_19	17	KPNA2	68035636	rs34931250	17	68883786	T	C	0.0511247	0.305552	0.0951603	0.0013231	0.114	0.0151511	5.303995e-14	2.68028	0.90757	0.00314445	0.539067	12	0.901443	4.45912	14.5892	2.46315	86.4112	14.589(2.463,86.411)	0.147003	16	0.999119	0.0003633	0.000508141	1.75239e-07	9.53094e-06	0.981946	9.70618e-06	54.3881
	SeqId_17726_3	10	SAR1A	70147289	rs870801	10	70169990	A	C	0.412065	-0.0986507	0.0353245	0.00522699	0.1499	0.00829593	5.581900e-73	-0.65811	0.238452	0.00578134	0.598572	20	-1.12548	-0.190744	0.517829	0.324498	0.826344	0.518(0.324,0.826)	0.216222
renal_carcinoma	SeqId_2797_56	2	APOB	21001429	rs563290	2	21065354	A	G	0.793456	0.131473	0.0471548	0.00530167	0.0874	0.0121435	6.143001e-13	1.50427	0.578597	0.00932646	0.288542	20	0.37022	2.63832	4.50087	1.44805	13.9897	4.501(1.448,13.99)	0.290675	1873	6.49979e-08	0.495604	2.12933e-08	0.162018	0.342378	0.678788	0.504396	2.11321
renal_carcinoma	SeqId_4337_49	1	CRP	159712289	rs2808628	1	159706221	A	G	0.316973	-0.0917942	0.0363201	0.0114921	-0.1647	0.00880257	4.068941e-78	0.557342	0.222525	0.0122582	0.256478	20	0.121193	0.993491	1.74603	1.12884	2.70065	1.746(1.129,2.701)	0.327469	1217	0.591038	0.316063	0.0463334	0.0247554	0.0218108	0.468382	0.0465662	0.881051
renal_carcinoma	SeqId_4437_56	14	ENTPD5	73958010	rs113768127	14	74001136	C	T	0.0787321	0.164435	0.0687798	0.0168146	-0.9106	0.013913	0.000000e+00	-0.180578	0.0755828	0.0168877	0.266246	20	-0.32872	-0.0324357	0.834788	0.719844	0.968085	0.835(0.72,0.968)	0.39475	377	2.83152e-17	0.908293	4.73481e-19	0.0151117	0.0765948	0.835217	0.0917065	5.06858
renal_carcinoma	SeqId_4964_67	5	ERAP1	96760810	rs30185	5	96789762	A	G	0.783231	-0.0940313	0.0417229	0.0242145	-1.1332	0.00458	0	0.0829785	0.0368202	0.0242204	0.669936	20	0.0108109	0.155146	1.08652	1.01087	1.16783	1.087(1.011,1.168)	0.496058	2386	0	0.702813	0	0.134823	0.162364	0.546336	0.297187	1.20427
renal_carcinoma	SeqId_11277_23	1	ATF6	161766298	rs10918270	1	161945711	A	G	0.413088	-0.0834619	0.0348416	0.0165993	-0.0493	0.00838506	4.114997e-09	1.69294	0.763133	0.0265271	0.112495	18	0.197199	3.18868	5.43544	1.21799	24.2564	5.435(1.218,24.256)	0.496058	924	0.936128	0.0151463	0.0468482	0.00075687	0.00112081	0.596912	0.00187768	1.48085
renal_carcinoma	SeqId_11568_2	2	FKBP1B	24049701	rs55788848	2	24045851	T	C	0.217791	-0.0921682	0.0444231	0.0380068	-0.2587	0.00996166	1.092972e-148	0.356274	0.172264	0.038622	0.559153	20	0.0186366	0.693911	1.428	1.01881	2.00153	1.428(1.019,2.002)	0.656574	1351	9.68778e-79	0.86551	8.90895e-80	0.0795379	0.0549519	0.408595	0.13449	0.690889
	SeqId_17453_34	3	CP	149162410	rs13089226	3	149080893	T	C	0.0419223	-0.178458	0.0823829	0.0302953	0.1228	0.0224825	4.706995e-08	-1.45325	0.721704	0.0440484			-2.86779	-0.0387102	0.233809	0.0568244	0.96203	0.234(0.057,0.962)	0.666442
	SeqId_14047_78	11	BDNF	27654893	rs79187269	11	27712220	C	G	0.0470348	-0.153301	0.0769408	0.0463213	0.0887	0.0162691	4.979010e-08	-1.72831	0.923537	0.0612893	0.285166	6	-3.53844	0.0818225	0.177584	0.0290585	1.08526	0.178(0.029,1.085)	0.666442
	SeqId_15343_337	3	KNG1	186717348	rs5030062	3	186736391	C	A	0.395706	-0.0652501	0.0351103	0.0631075	0.3618	0.007161	0	-0.180348	0.0971089	0.0632859	0.744717	20	-0.370681	0.00998544	0.83498	0.690264	1.01004	0.835(0.69,1.01)	0.666442
	SeqId_19631_13	3	KNG1	186717348	rs5030062	3	186736391	C	A	0.395706	-0.0652501	0.0351103	0.0631075	0.2433	0.008557	7.938748e-178	-0.268188	0.144616	0.0636711	0.843299	20	-0.551635	0.0152594	0.764764	0.576007	1.01538	0.765(0.576,1.015)	0.666442
	SeqId_15395_15	1	GSTM1	109687814	rs115929572	1	109703431	A	G	0.0654397	0.139954	0.0772799	0.0701404	0.8161	0.012159	0	0.171491	0.0947286	0.0702425	0.252678	14	-0.0141771	0.357159	1.18707	0.985923	1.42926	1.187(0.986,1.429)	0.666442
	SeqId_19523_215	1	PARK7	7954291	rs226251	1	7964630	C	T	0.596115	-0.0632001	0.0351282	0.0719988	0.1128	0.00821346	6.391955e-43	-0.560284	0.314081	0.0744425	0.209756	20	-1.17588	0.0553148	0.571047	0.308546	1.05687	0.571(0.309,1.057)	0.666442
	SeqId_10534_40	1	PARP1	226360210	rs1433574	1	226421638	C	A	0.172802	-0.0825318	0.0449609	0.066412	-0.0599	0.0100651	2.661002e-09	1.37783	0.785494	0.0794155	0.792183	20	-0.161738	2.9174	3.96629	0.850664	18.4931	3.966(0.851,18.493)	0.666442
	SeqId_9790_28	11	BRSK2	1389899	rs4255564	11	1384495	T	C	0.704499	-0.0694809	0.0410418	0.0904688	-0.1739	0.00980843	2.476060e-70	0.399545	0.237082	0.0919376	0.107215	20	-0.0651357	0.864226	1.49115	0.93694	2.37317	1.491(0.937,2.373)	0.666442
	SeqId_3175_51	9	ADAMTS13	133414358	rs28647808	9	133440409	G	C	0.0817996	-0.114228	0.0682455	0.0941744	-0.8811	0.009132	0	0.129642	0.0774666	0.0942239	0.442375	20	-0.0221925	0.281477	1.13842	0.978052	1.32508	1.138(0.978,1.325)	0.666442
	SeqId_8840_61	12	C1S	6988259	rs9645765	12	6007291	G	A	0.108384	-0.11552	0.068783	0.0930581	-0.1305	0.0146237	4.501983e-19	0.88521	0.536326	0.0988394	0.908537	7	-0.165989	1.93641	2.42349	0.847056	6.93381	2.423(0.847,6.934)	0.666442
	SeqId_15514_26	3	BCHE	165772904	rs1803274	3	165773492	T	C	0.186094	-0.0727247	0.0443554	0.10109	-0.5167	0.00758	0	0.140748	0.0858685	0.101189	0.612329	20	-0.0275543	0.30905	1.15113	0.972822	1.36213	1.151(0.973,1.362)	0.666442
	SeqId_17460_51	21	MX1	41420020	rs464138	21	41426246	C	A	0.388548	0.0580902	0.0355323	0.102079	-0.3265	0.006889	0	-0.177918	0.108893	0.102283	0.00305169	20	-0.391348	0.0355123	0.837011	0.676145	1.03615	0.837(0.676,1.036)	0.666442
	SeqId_6359_50	3	POMGNT2	43079229	rs1949585	3	43104624	T	A	0.461145	0.0566785	0.0349684	0.10505	-0.3313	0.006475	0	-0.171079	0.105602	0.105225	0.125215	20	-0.378059	0.0359009	0.842755	0.68519	1.03655	0.843(0.685,1.037)	0.666442
	SeqId_3848_14	12	GAPDH	6534512	rs12425927	12	6538662	G	A	0.110429	0.0943803	0.0566138	0.0954962	0.0807	0.0131026	7.316982e-10	1.16952	0.726778	0.107576	0.0258953	20	-0.254965	2.594	3.22045	0.774944	13.3833	3.22(0.775,13.383)	0.666442
	SeqId_3651_50	4	KDR	55078481	rs2305948	4	55113391	T	C	0.0961145	-0.0904195	0.056411	0.108963	0.3299	0.0162649	1.819013e-91	-0.274081	0.171527	0.110068	0.426881	8	-0.610274	0.0621119	0.76027	0.543202	1.06408	0.76(0.543,1.064)	0.666442
	SeqId_12041_33	6	HSPA1L	31809619	rs550671	6	31976816	T	C	0.140082	0.0869893	0.054257	0.108872	0.1855	0.0116051	1.641994e-57	0.468945	0.293958	0.11065	0.370584	20	-0.107213	1.0451	1.59831	0.898335	2.84369	1.598(0.898,2.844)	0.666442
	SeqId_11212_7	6	TXNDC5	7881517	rs1043784	6	7881698	C	T	0.127812	0.0870893	0.054794	0.111972	-0.1949	0.013075	3.000993e-50	-0.446841	0.282733	0.114007	0.338642	20	-1.001	0.107316	0.639646	0.367513	1.11329	0.64(0.368,1.113)	0.666442
	SeqId_18435_40	8	UBXN2B	58411359	rs7000685	8	58004774	C	G	0.432515	0.0586305	0.0364941	0.108147	-0.0604	0.00825464	2.534001e-13	-0.970704	0.618599	0.116602	0.397672	20	-2.18316	0.24175	0.378816	0.112685	1.27348	0.379(0.113,1.273)	0.666442
	SeqId_8007_19	8	CTSB	11842524	rs2645425	8	11843769	A	G	0.259714	-0.0612497	0.0391088	0.117317	0.6105	0.006822	0	-0.100327	0.06407	0.117373	0.0124873	20	-0.225904	0.0252502	0.904542	0.797795	1.02557	0.905(0.798,1.026)	0.666442
	SeqId_4131_72	2	FN1	215360440	rs1250258	2	215435462	T	C	0.765849	0.0622864	0.0402544	0.121786	0.176	0.00819181	2.155953e-102	0.3539	0.22931	0.122753	0.433514	20	-0.0955476	0.803348	1.42461	0.908875	2.233	1.425(0.909,2.233)	0.666442
	SeqId_2855_49	16	MAPK3	30114105	rs6565175	16	30133058	G	C	0.436605	0.0568086	0.0367679	0.122332	0.2397	0.008202	9.44939e-188	0.236999	0.153606	0.122854	0.265417	20	-0.0640688	0.538067	1.26744	0.937941	1.71269	1.267(0.938,1.713)	0.666442
	SeqId_3434_34	2	FN1	215360440	rs1250258	2	215435462	T	C	0.765849	0.0622864	0.0402544	0.121786	0.1591	0.0082431	5.267994e-83	0.391492	0.253825	0.122983	0.472026	20	-0.106005	0.888989	1.47919	0.89942	2.43267	1.479(0.899,2.433)	0.666442
	SeqId_3435_53	2	FN1	215360440	rs1250259	2	215435759	A	T	0.766871	0.0623702	0.0403098	0.121797	0.157	0.00824055	6.308036e-81	0.397263	0.257595	0.123026	0.520375	20	-0.107623	0.902149	1.48775	0.897966	2.46489	1.488(0.898,2.465)	0.666442
	SeqId_7994_41	1	ERO1LB	236214681	rs2477599	1	236249930	A	T	0.604294	-0.0540153	0.0359118	0.132553	-0.1665	0.00811656	1.627006e-93	0.324416	0.216265	0.133593	0.267076	20	-0.0994634	0.748295	1.38322	0.905323	2.11339	1.383(0.905,2.113)	0.666442
	SeqId_9869_28	4	NFKB1	102501330	rs230539	4	102574375	A	G	0.660532	0.0557729	0.0365249	0.126765	-0.0657	0.00830711	2.596993e-15	-0.848902	0.566201	0.133797	0.443571	20	-1.95866	0.260852	0.427884	0.141048	1.29804	0.428(0.141,1.298)	0.666442
	SeqId_3820_68	1	MAPKAPK2	206684905	rs4256810	1	206717104	C	T	0.315951	-0.0551491	0.0367365	0.133302	0.1771	0.00912067	5.4959e-84	-0.311401	0.208053	0.134461	0.00888174	20	-0.719185	0.0963829	0.73242	0.487149	1.10118	0.732(0.487,1.101)	0.666442
	SeqId_6364_7	12	TAPBPL	6451690	rs2041388	12	6453670	A	G	0.297546	0.0566935	0.0383585	0.13941	1.3258	0.003943	0	0.0427617	0.0289326	0.139414	0.632579	20	-0.0139462	0.0994696	1.04369	0.986151	1.10458	1.044(0.986,1.105)	0.666442
	SeqId_2730_58	6	MICA	31399784	rs2256183	6	31412752	G	A	0.608384	0.0522306	0.0356685	0.143103	-1.0417	0.004066	0.000000e+00	-0.0501398	0.0342412	0.14311	0.138382	20	-0.117253	0.016973	0.951096	0.889361	1.01712	0.951(0.889,1.017)	0.666442
	SeqId_11287_14	18	CYB5A	74250846	rs17806420	18	74316132	T	C	0.148262	0.0689712	0.0467326	0.139979	-0.1014	0.0100701	7.541955e-24	-0.68019	0.465798	0.144217	0.61402	20	-1.59315	0.232774	0.506521	0.203283	1.2621	0.507(0.203,1.262)	0.666442
	SeqId_9204_33	2	POMC	25160853	rs113786862	2	25059198	T	C	0.0501022	0.120493	0.080364	0.133787	0.104	0.0175805	3.305995e-09	1.15858	0.797164	0.146118	0.649538	17	-0.403861	2.72102	3.18541	0.667737	15.1958	3.185(0.668,15.196)	0.666442
	SeqId_16825_20	14	ATXN3	92044496	rs2273185	14	91993754	A	C	0.317996	0.0516151	0.0364693	0.15698	-0.2439	0.008247	3.190632e-192	-0.211624	0.149697	0.157454	0.987484	20	-0.50503	0.0817821	0.809269	0.603487	1.08522	0.809(0.603,1.085)	0.701047
	SeqId_19173_5	8	ZFAND1	81701334	rs2130263	8	81721217	G	C	0.155419	0.0687363	0.0496607	0.166323	0.1941	0.0107312	3.99598e-73	0.354128	0.256599	0.167561	0.0427409	20	-0.148806	0.857062	1.42494	0.861736	2.35623	1.425(0.862,2.356)	0.716471
	SeqId_6923_1	3	PLOD2	146035139	rs6800294	3	146127475	T	C	0.506135	0.048098	0.034602	0.164518	-0.0809	0.00809676	1.657995e-23	-0.594536	0.431832	0.168581	0.0109791	20	-1.44093	0.251855	0.551819	0.236708	1.28641	0.552(0.237,1.286)	0.716471
	SeqId_5102_55	6	MICB	31494881	rs3134900	6	31506180	G	C	0.0879346	-0.0779505	0.057441	0.174764	-1.0246	0.009968	0.000000e+00	0.076079	0.0560668	0.174802	0.279683	20	-0.0338119	0.18597	1.07905	0.966753	1.20439	1.079(0.967,1.204)	0.726399
	SeqId_2973_15	7	CD36	80369575	rs6961069	7	80589645	T	C	0.419223	-0.0460369	0.0352017	0.19094	0.1637	0.00822359	3.600069e-88	-0.281227	0.215502	0.191897	0.459751	20	-0.703611	0.141157	0.754857	0.494795	1.15161	0.755(0.495,1.152)	0.746507
	SeqId_5508_62	11	CTSD	1752752	rs55861089	11	1762527	G	A	0.0940695	-0.0796133	0.0621742	0.200373	-0.3255	0.0128031	1.385960e-142	0.244588	0.191253	0.200944	0.418536	20	-0.130268	0.619444	1.2771	0.87786	1.85789	1.277(0.878,1.858)	0.746507
	SeqId_19266_35	5	G3BP1	151771045	rs2964576	5	151771041	G	T	0.266871	-0.0519539	0.0413452	0.208903	-0.0691	0.00885589	6.05899e-15	0.751865	0.606049	0.214753	0.837599	20	-0.435991	1.93972	2.12095	0.646624	6.95681	2.121(0.647,6.957)	0.746507
	SeqId_3593_72	4	CASP3	184627696	rs111667591	4	184671855	G	A	0.118609	0.0728319	0.0587508	0.215096	-0.2269	0.012542	3.742054e-73	-0.320987	0.259535	0.216171	0.842726	20	-0.829676	0.187702	0.725433	0.436191	1.20647	0.725(0.436,1.206)	0.746507
	SeqId_18901_26	6	HSPA1B	31827738	rs72848261	6	32634013	C	G	0.251534	0.0736566	0.0587785	0.210161	0.0592	0.00843902	2.298996e-12	1.2442	1.0086	0.217354	0.314133	20	-0.732656	3.22106	3.47016	0.480631	25.0546	3.47(0.481,25.055)	0.746507
	SeqId_16890_37	9	ADAMTSL1	17906563	rs117103010	9	18584995	T	C	0.0633947	-0.0965894	0.0784996	0.21853	0.4595	0.0203065	2.283927e-113	-0.210206	0.171089	0.219211	0.62308	20	-0.54554	0.125128	0.810417	0.579528	1.13329	0.81(0.58,1.133)	0.746507
	SeqId_3905_62	12	UBE2N	93405673	rs10859511	12	93529957	A	T	0.143149	0.0586473	0.0471102	0.213171	-0.0634	0.0112053	1.530999e-08	-0.925036	0.760837	0.224056	0.921007	12	-2.41628	0.566205	0.396517	0.0892533	1.76157	0.397(0.089,1.762)	0.746507
	SeqId_13700_10	15	ANXA2	60347134	rs8033800	15	60396980	A	T	0.580777	-0.0455951	0.0375644	0.22483	-0.5649	0.006405	0	0.0807135	0.0665037	0.224874	0.979374	20	-0.0496338	0.211061	1.08406	0.951578	1.23499	1.084(0.952,1.235)	0.746507
	SeqId_4961_17	15	ANXA2	60347134	rs8033800	15	60396980	A	T	0.580777	-0.0455951	0.0375644	0.22483	-0.4607	0.006797	0	0.0989691	0.0815507	0.224904	0.989314	20	-0.0608703	0.258808	1.10403	0.940945	1.29539	1.104(0.941,1.295)	0.746507
	SeqId_9459_7	10	FAS	88953813	rs7911226	10	89009208	G	A	0.305726	-0.0445629	0.0369449	0.22774	-0.2478	0.008988	2.541897e-167	0.179834	0.149234	0.228185	0.119106	20	-0.112665	0.472333	1.19702	0.89345	1.60373	1.197(0.893,1.604)	0.746507
	SeqId_5392_73	10	FAS	88953813	rs7911226	10	89009208	G	A	0.305726	-0.0445629	0.0369449	0.22774	-0.2358	0.008958	1.050540e-152	0.188986	0.156843	0.228228	0.134327	20	-0.118426	0.496398	1.20802	0.888317	1.64279	1.208(0.888,1.643)	0.746507
	SeqId_3340_53	5	THBS4	79991311	rs13167730	5	80074424	T	G	0.102249	-0.0766598	0.0636962	0.228774	0.3753	0.0152939	5.645131e-133	-0.204263	0.169925	0.229334	0.966203	20	-0.537316	0.12879	0.815248	0.584314	1.13745	0.815(0.584,1.137)	0.746507
	SeqId_2579_17	20	MMP9	46008908	rs2250889	20	46013767	C	G	0.95501	-0.093936	0.0776942	0.226644	-0.1687	0.0203352	1.077003e-16	0.556823	0.465412	0.231537	0.296357	8	-0.355385	1.46903	1.74512	0.700904	4.34502	1.745(0.701,4.345)	0.746507
	SeqId_8356_88	20	OXT	3071620	rs877172	20	3069244	G	T	0.352761	-0.0549975	0.0465556	0.237472	0.3649	0.007019	0.000000e+00	-0.150719	0.127617	0.237593	0.845756	20	-0.400848	0.0994103	0.860089	0.669752	1.10452	0.86(0.67,1.105)	0.747765
	SeqId_3583_54	22	ARSA	50622754	rs2071421	22	50625988	C	T	0.141104	-0.0648757	0.0547417	0.235968	-0.1166	0.0128297	1.006001e-19	0.556396	0.473457	0.239925	0.565885	20	-0.37158	1.48437	1.74437	0.689644	4.41219	1.744(0.69,4.412)	0.747765
	SeqId_9837_60	16	NQO1	69706996	rs2161631	16	69523045	A	C	0.223926	-0.0517812	0.0449909	0.249763	-0.8614	0.007564	0	0.0601128	0.0522326	0.249787	0.697583	20	-0.0422631	0.162489	1.06196	0.958618	1.17644	1.062(0.959,1.176)	0.758659
	SeqId_11387_3	6	ATF6B	32115264	rs8111	6	32115398	T	C	0.288344	0.0419985	0.0365766	0.250872	0.2118	0.00975314	1.446004e-104	0.198293	0.172936	0.251534	0.315275	20	-0.140662	0.537248	1.21932	0.868783	1.71129	1.219(0.869,1.711)	0.758659
	SeqId_2418_55	19	APOE	44905791	rs71352239	19	44926286	T	C	0.294479	0.0486866	0.0431286	0.258953	0.2482	0.008893	2.040818e-171	0.196159	0.173908	0.259342	0.0110356	20	-0.144701	0.537019	1.21672	0.865281	1.7109	1.217(0.865,1.711)	0.761627
	SeqId_4911_49	11	GSTP1	67583742	rs1254123	11	67567341	C	T	0.49591	0.0386039	0.0342335	0.259461	-0.1262	0.00796197	1.397968e-56	-0.305895	0.271949	0.260664	0.558771	20	-0.838915	0.227125	0.736464	0.432179	1.25499	0.736(0.432,1.255)	0.761627
	SeqId_3066_12	14	LGALS3	55124110	rs76424323	14	55145855	G	A	0.0797546	-0.0724834	0.0653754	0.267548	-0.5703	0.011608	0.000000e+00	0.127097	0.114662	0.26767	0.242178	20	-0.0976405	0.351835	1.13553	0.906975	1.42167	1.136(0.907,1.422)	0.762229
	SeqId_8043_153	19	COMP	18782773	rs2075762	19	18879050	A	G	0.115542	0.0529114	0.047906	0.269383	-0.1496	0.0131426	5.092007e-30	-0.353686	0.321731	0.271628	0.907081	13	-0.984279	0.276907	0.702095	0.373709	1.31904	0.702(0.374,1.319)	0.762229
	SeqId_5813_58	7	EPO	100720468	rs221790	7	100680659	C	G	0.593047	-0.0387211	0.0350238	0.268915	0.0691	0.00829458	8.033998e-17	-0.560363	0.5113	0.273098	0.433108	20	-1.56251	0.441785	0.571002	0.209609	1.55548	0.571(0.21,1.555)	0.762229
	SeqId_5660_51	4	SOD3	24789912	rs2695234	4	24802616	G	A	0.90593	0.0692609	0.0649459	0.286225	-0.5368	0.015862	4.776706e-251	-0.129025	0.121047	0.286464	0.690317	10	-0.366277	0.108227	0.878952	0.693311	1.1143	0.879(0.693,1.114)	0.787777
	SeqId_10490_3	3	RPN1	128619969	rs4481172	3	128653814	A	C	0.631902	0.0384597	0.036548	0.292659	-0.1504	0.00802915	2.727963e-78	-0.255716	0.243389	0.29342	0.528517	20	-0.732758	0.221326	0.774362	0.480582	1.24773	0.774(0.481,1.248)	0.790563
	SeqId_8795_48	3	TFRC	196012511	rs3827554	3	196082245	C	A	0.678937	0.0396061	0.0379098	0.29614	0.0761	0.00883794	7.267978e-18	0.520449	0.501812	0.299671	0.0787837	20	-0.463103	1.504	1.68278	0.629328	4.49965	1.683(0.629,4.5)	0.790563
	SeqId_3077_66	13	F10	113122799	rs547138	13	113137856	A	T	0.612474	-0.0445039	0.0432571	0.303563	0.154	0.00844435	2.623044e-74	-0.288986	0.281337	0.304331	0.392372	20	-0.840407	0.262435	0.749023	0.431535	1.30009	0.749(0.432,1.3)	0.790563
	SeqId_4878_3	13	F10	113122799	rs547138	13	113137856	A	T	0.612474	-0.0445039	0.0432571	0.303563	0.1473	0.00836853	2.391944e-69	-0.302131	0.294168	0.304388	0.44193	20	-0.8787	0.274438	0.739241	0.415322	1.31579	0.739(0.415,1.316)	0.790563
	SeqId_2925_9	7	SERPINE1	101127104	rs7782121	7	101193338	A	G	0.929448	-0.0638053	0.0627486	0.309229	-0.118	0.0143563	2.044999e-16	0.540723	0.535821	0.312904	0.607693	19	-0.509486	1.59093	1.71725	0.600804	4.90832	1.717(0.601,4.908)	0.801548
	SeqId_19334_62	1	TXNDC12	52020131	rs6686632	1	52117939	C	T	0.0746421	0.0685364	0.068769	0.31895	-0.1563	0.0142012	3.572005e-28	-0.438493	0.441781	0.320926	0.0663774	20	-1.30438	0.427398	0.645008	0.27134	1.53326	0.645(0.271,1.533)	0.810988
	SeqId_5006_71	6	MAPK13	36127809	rs10447396	6	36145821	A	G	0.307771	-0.0371724	0.0384804	0.33404	0.1156	0.00924456	7.040971e-36	-0.32156	0.333867	0.335478	0.733323	20	-0.975939	0.332819	0.725017	0.376838	1.3949	0.725(0.377,1.395)	0.824668
	SeqId_3143_3	12	CD4	6786858	rs61916271	12	6781356	A	G	0.209611	0.0425028	0.0438174	0.332048	-0.0607	0.00974583	4.714998e-10	-0.70021	0.73057	0.337839	0.433972	8	-2.13213	0.731707	0.496481	0.118585	2.07863	0.496(0.119,2.079)	0.824668
	SeqId_5634_39	20	POFUT1	32207855	rs17268666	20	32231047	T	C	0.0725971	0.0935382	0.098403	0.341826	-0.6529	0.018747	9.525667e-266	-0.143266	0.150773	0.342006	0.0578797	20	-0.438781	0.152249	0.866524	0.644822	1.16445	0.867(0.645,1.164)	0.824668
	SeqId_2961_1	2	PROC	127418427	rs61185143	2	127407902	C	T	0.579755	-0.033188	0.0353125	0.347301	0.1422	0.00801116	1.716041e-70	-0.23339	0.248678	0.347976	0.0125912	20	-0.720799	0.254019	0.791845	0.486364	1.2892	0.792(0.486,1.289)	0.824668
	SeqId_3554_24	3	ADIPOQ	186842704	rs35469083	3	186856493	T	C	0.0613497	0.0751424	0.0800723	0.348022	-0.4199	0.0174665	1.052984e-127	-0.178953	0.190839	0.348389	0.203319	10	-0.552997	0.195091	0.836145	0.575223	1.21542	0.836(0.575,1.215)	0.824668
	SeqId_4157_2	11	F2	46719196	rs3136516	11	46739206	A	G	0.522495	0.0327134	0.0357759	0.360507	-0.1125	0.00838403	4.719985e-41	-0.290786	0.318745	0.361619	0.655399	20	-0.915526	0.333954	0.747676	0.400306	1.39648	0.748(0.4,1.396)	0.830421
	SeqId_5316_54	11	F2	46719196	rs3136516	11	46739206	A	G	0.522495	0.0327134	0.0357759	0.360507	-0.0971	0.00790815	1.182007e-34	-0.336904	0.369464	0.361835	0.61743	20	-1.06105	0.387245	0.713977	0.346091	1.47292	0.714(0.346,1.473)	0.830421
	SeqId_8957_72	2	ERLEC1	53787009	rs2542580	2	53824607	A	C	0.178937	-0.0409274	0.0453339	0.366632	-0.1003	0.0109307	4.472998e-20	0.40805	0.454165	0.368939	0.234457	20	-0.482113	1.29821	1.50388	0.617477	3.66275	1.504(0.617,3.663)	0.830421
	SeqId_18934_50	20	TGM2	38127385	rs13039547	20	38169451	G	C	0.637014	-0.0316004	0.0352657	0.370217	0.1798	0.0082492	2.528919e-105	-0.175753	0.196304	0.370621	0.374527	20	-0.560509	0.209003	0.838825	0.570918	1.23245	0.839(0.571,1.232)	0.830421
	SeqId_15540_6	10	VIM	17228241	rs796667	10	16904820	T	G	0.652352	-0.0314169	0.0356201	0.377777	-0.0763	0.00806288	2.988995e-21	0.411755	0.468866	0.379838	0.514825	20	-0.507222	1.33073	1.50946	0.602166	3.78381	1.509(0.602,3.784)	0.830421
	SeqId_18839_24	8	TG	132866958	rs733735	8	133102472	A	G	0.525562	0.0301613	0.0345557	0.382755	0.0734	0.00799235	4.162014e-20	0.410917	0.472907	0.384893	0.157302	20	-0.515981	1.33781	1.5082	0.596915	3.81071	1.508(0.597,3.811)	0.830421
	SeqId_5231_79	1	PCSK9	55039447	rs472495	1	55055640	T	G	0.627812	-0.0336421	0.0394813	0.394158	0.1566	0.00861847	8.87512e-74	-0.214828	0.252393	0.394677	0.985522	20	-0.709518	0.279862	0.80668	0.491881	1.32295	0.807(0.492,1.323)	0.830421
	SeqId_5687_5	19	PRKCSH	11435284	rs11557488	19	11447460	A	G	0.225971	0.0472211	0.056316	0.401748	0.1132	0.00969474	1.681991e-31	0.417148	0.498772	0.402958	0.901082	12	-0.560445	1.39474	1.51763	0.570955	4.03393	1.518(0.571,4.034)	0.830421
	SeqId_9468_8	5	LMAN2	177315805	rs4131289	5	177353544	A	G	0.342536	0.031081	0.0375155	0.407396	0.0956	0.00852949	3.717968e-29	0.325115	0.393492	0.408674	0.672827	20	-0.446129	1.09636	1.38419	0.640101	2.99325	1.384(0.64,2.993)	0.830421
	SeqId_12356_65	7	SRI	88205115	rs55729732	7	88312034	A	G	0.188139	0.0362018	0.044037	0.411032	0.1349	0.0102029	6.574958e-40	0.268361	0.327072	0.411934	0.624154	20	-0.3727	0.909422	1.30782	0.688872	2.48289	1.308(0.689,2.483)	0.830421
	SeqId_15626_223	1	HSPG2	21822244	rs2229475	1	21855402	T	C	0.0490798	-0.0612589	0.0747145	0.412269	0.5138	0.017412	2.24718e-191	-0.119227	0.145472	0.41245	0.838555	8	-0.404352	0.165898	0.887606	0.667409	1.18045	0.888(0.667,1.18)	0.830421
	SeqId_19361_78	2	MATN3	19992052	rs2670634	2	20018380	A	G	0.393661	-0.0321319	0.0396878	0.418159	0.5728	0.006096	0	-0.0560963	0.0692899	0.418177	0.614359	20	-0.191905	0.0797119	0.945448	0.825386	1.08298	0.945(0.825,1.083)	0.830421
	SeqId_12378_71	6	TAPBP	33299694	rs3135409	6	33306743	C	A	0.521472	0.0279707	0.0345721	0.418484	-0.3005	0.00816	7.089090e-297	-0.0930805	0.115076	0.418596	0.790354	20	-0.318629	0.132468	0.91112	0.727145	1.14164	0.911(0.727,1.142)	0.830421
	SeqId_19223_6	2	RAB1A	65070696	rs2422441	2	65143632	G	A	0.703476	-0.0302926	0.037471	0.418845	0.0607	0.00936936	9.260011e-11	-0.499055	0.622103	0.422434	0.94157	15	-1.71838	0.720267	0.607104	0.179357	2.05498	0.607(0.179,2.055)	0.830421
	SeqId_3484_60	1	AGT	230690776	rs2071404	1	230715194	A	C	0.106339	-0.042788	0.0533881	0.422869	0.2772	0.0136345	6.871811e-92	-0.154358	0.192747	0.423229	0.858729	20	-0.532142	0.223426	0.856965	0.587345	1.25035	0.857(0.587,1.25)	0.830421
	SeqId_16322_10	5	PACAP	139387467	rs116498185	5	139190262	T	C	0.0623722	-0.0828068	0.103805	0.425034	0.251	0.0180377	5.117091e-44	-0.329908	0.414243	0.425793	0.250051	8	-1.14182	0.482008	0.71899	0.319236	1.61932	0.719(0.319,1.619)	0.830421
	SeqId_7161_25	1	H6PD	9234774	rs7555568	1	9232547	A	G	0.400818	0.029687	0.0373161	0.426291	-0.462	0.005629	0	-0.0642576	0.0807747	0.426313	0.946251	20	-0.222576	0.0940608	0.937763	0.800454	1.09863	0.938(0.8,1.099)	0.830421
	SeqId_14067_6	12	PKP2	32790745	rs16920249	12	32815402	G	A	0.0480573	0.0570262	0.0743241	0.442924	0.1682	0.0166516	5.459983e-24	0.339038	0.443152	0.444236	0.280642	11	-0.52954	1.20762	1.4036	0.588876	3.3455	1.404(0.589,3.345)	0.840406
	SeqId_10818_36	11	SMPD1	6390440	rs1050239	11	6394233	A	G	0.205521	0.0335257	0.0441398	0.447533	-0.3608	0.006687	0.000000e+00	-0.0929205	0.122351	0.447578	0.3769	19	-0.332728	0.146887	0.911266	0.716965	1.15822	0.911(0.717,1.158)	0.840406
	SeqId_18382_109	22	COMT	19941371	rs165722	22	19961490	T	C	0.502045	-0.0265769	0.0349378	0.446841	-0.0822	0.00827299	2.903992e-23	0.32332	0.426278	0.448169	0.0277351	20	-0.512185	1.15882	1.38171	0.599185	3.18619	1.382(0.599,3.186)	0.840406
	SeqId_2580_83	17	MPO	58269855	rs34097845	17	58281068	T	C	0.0531697	-0.0826544	0.109236	0.449254	-0.5179	0.018241	2.53249e-177	0.159595	0.210996	0.449415	0.327437	20	-0.253957	0.573147	1.17304	0.775725	1.77384	1.173(0.776,1.774)	0.840406
	SeqId_18875_125	12	COL2A1	47972967	rs7299271	12	48020275	T	C	0.381391	-0.0245219	0.0349755	0.48323	-0.7006	0.005432	0	0.0350013	0.0499229	0.483236	0.1518	20	-0.0628476	0.13285	1.03562	0.939087	1.14208	1.036(0.939,1.142)	0.892759
	SeqId_11103_24	7	HSPB1	76302673	rs2868371	7	76301442	G	C	0.260736	0.0278977	0.0401349	0.486993	-0.5036	0.00768	0	-0.0553966	0.0797005	0.487018	0.780865	20	-0.21161	0.100816	0.94611	0.809281	1.10607	0.946(0.809,1.106)	0.892759
	SeqId_14684_17	1	CAPN2	223701593	rs72747990	1	223673802	G	C	0.0316973	-0.0625576	0.0908793	0.491227	-0.2881	0.020246	5.973011e-46	0.217138	0.315812	0.491733	0.418616	4	-0.401854	0.83613	1.24252	0.669079	2.30742	1.243(0.669,2.307)	0.892759
	SeqId_8916_32	11	STIM1	3854527	rs1869085	11	3883134	C	A	0.334356	0.0248273	0.0369231	0.501324	-0.0951	0.00850939	5.351025e-29	-0.261066	0.388957	0.502097	0.720538	20	-1.02342	0.50129	0.77023	0.359363	1.65085	0.77(0.359,1.651)	0.90281
	SeqId_8053_16	4	DNAJB14	99896248	rs55797991	4	99850238	T	C	0.142127	0.0339139	0.0517229	0.512028	-0.0839	0.0120245	3.007006e-12	-0.404218	0.619199	0.51388	0.566621	20	-1.61785	0.809412	0.667499	0.198325	2.24659	0.667(0.198,2.247)	0.907542
	SeqId_4160_49	16	MMP2	55389700	rs171498	16	55496850	T	G	0.372188	0.0231416	0.0356604	0.516375	-0.0954	0.00856247	7.864989e-29	-0.242574	0.374433	0.517085	0.912794	20	-0.976463	0.491315	0.784606	0.376641	1.63446	0.785(0.377,1.634)	0.907542
	SeqId_2836_68	9	LCN2	128149071	rs2900262	9	128162247	C	T	0.943763	-0.05309	0.0825395	0.52009	0.1132	0.0191853	3.626998e-09	-0.468993	0.733467	0.52255			-1.90659	0.968602	0.625632	0.148586	2.63426	0.626(0.149,2.634)	0.907542
	SeqId_7784_1	3	KNG1	186717348	rs2304456	3	186727263	G	T	0.105317	0.0339983	0.0533606	0.524032	0.3389	0.012253	2.203572e-168	0.10032	0.157494	0.524142	0.588494	20	-0.208368	0.409008	1.10552	0.811908	1.50532	1.106(0.812,1.505)	0.907542
	SeqId_2731_29	7	POR	75899200	rs59882870	7	76009103	A	G	0.173824	-0.0268755	0.0446329	0.547076	0.193	0.010811	2.779018e-71	-0.139251	0.23139	0.547304	0.91482	20	-0.592775	0.314273	0.87001	0.552791	1.36926	0.87(0.553,1.369)	0.922592
	SeqId_3858_5	2	ACP1	264140	rs11553746	2	272203	T	C	0.333333	0.0215809	0.0370388	0.560124	1.0882	0.004401	0	0.0198318	0.0340369	0.560125	0.844351	20	-0.0468805	0.0865441	1.02003	0.954201	1.0904	1.02(0.954,1.09)	0.922592
	SeqId_3171_57	21	APP	25880535	rs439826	21	26156328	G	T	0.643149	-0.0213943	0.0366793	0.559705	-0.0779	0.00878614	7.565997e-19	0.274638	0.471869	0.560552	0.543077	20	-0.650225	1.1995	1.31605	0.521928	3.31846	1.316(0.522,3.318)	0.922592
	SeqId_8893_29	1	PARP1	226360210	rs878367	1	226349821	T	C	0.166667	0.027374	0.0470191	0.560439	0.0674	0.0110668	1.127e-09	0.406143	0.700793	0.56222	0.489656	15	-0.967411	1.7797	1.50102	0.380066	5.92806	1.501(0.38,5.928)	0.922592
	SeqId_17398_55	22	HMOX1	35380361	rs75689278	22	35376664	G	A	0.0623722	0.0492966	0.0850923	0.562366	-0.1332	0.0218	9.957998e-10	-0.370095	0.641696	0.564112	0.52245	4	-1.62782	0.887629	0.690669	0.196357	2.42936	0.691(0.196,2.429)	0.922592
	SeqId_3220_40	10	RET	43077064	rs2435359	10	43084567	G	A	0.743354	-0.0221152	0.0390715	0.571382	0.3379	0.009151	1.839966e-298	-0.0654488	0.115644	0.571427	0.0501991	20	-0.292111	0.161213	0.936647	0.746686	1.17494	0.937(0.747,1.175)	0.922592
	SeqId_16558_2	1	MYOC	171635417	rs7547721	1	171648625	A	G	0.104294	0.0328465	0.0632437	0.603507	-0.4858	0.01472	7.425284e-239	-0.0676132	0.130201	0.603551	0.778406	20	-0.322807	0.187581	0.934622	0.724113	1.20633	0.935(0.724,1.206)	0.922592
	SeqId_8013_9	2	LMAN2L	96705929	rs72809827	2	96725216	T	C	0.306748	-0.018732	0.0368431	0.611154	0.1091	0.0083652	7.047022e-39	-0.171696	0.337957	0.611424	0.0944924	20	-0.834092	0.4907	0.842235	0.434269	1.63346	0.842(0.434,1.633)	0.922592
	SeqId_2644_11	17	PRKCA	66302613	rs61762372	17	66302564	A	G	0.437628	-0.0183701	0.0370482	0.620005	0.0808	0.00848019	1.602006e-21	-0.227352	0.459138	0.620478	0.331604	20	-1.12726	0.672558	0.79664	0.323919	1.95924	0.797(0.324,1.959)	0.922592
	SeqId_5108_72	19	NOTCH3	15159038	rs10417239	19	15183913	A	G	0.146217	0.0238359	0.0488128	0.625328	0.113	0.0127228	6.585006e-19	0.210938	0.432624	0.625849	0.403952	15	-0.637005	1.05888	1.23484	0.528874	2.88314	1.235(0.529,2.883)	0.922592
	SeqId_5018_68	1	PRDX6	173477330	rs6660804	1	173469260	A	C	0.161554	-0.0219529	0.0450812	0.626285	0.1228	0.0114465	7.509996e-27	-0.178769	0.367488	0.62664	0.662059	20	-0.899045	0.541507	0.836299	0.406958	1.7186	0.836(0.407,1.719)	0.922592
	SeqId_5593_11	3	PDIA5	123067025	rs3804749	3	123114156	T	C	0.587935	0.0176477	0.036346	0.627288	-0.6305	0.006566	0	-0.02799	0.057647	0.627293	0.933733	20	-0.140978	0.0849981	0.972398	0.868508	1.08872	0.972(0.869,1.089)	0.922592
	SeqId_11616_9	8	HSF1	144291591	rs7388446	8	144301721	T	C	0.493865	0.0175726	0.0371217	0.635942	-0.0639	0.00810431	3.152999e-15	-0.275002	0.58198	0.636549	0.0999853	20	-1.41568	0.865679	0.759571	0.24276	2.37662	0.76(0.243,2.377)	0.922592
	SeqId_7891_45	2	UGT1A6	233691607	rs887829	2	233759924	T	C	0.297546	0.0167136	0.0362321	0.644589	-0.2321	0.008441	1.920477e-166	-0.0720103	0.156127	0.644636	0.704497	20	-0.378019	0.233999	0.930521	0.685217	1.26364	0.931(0.685,1.264)	0.922592
	SeqId_7110_2	3	DNAJB11	186567403	rs9841006	3	186575346	T	C	0.0899796	0.0296002	0.0642378	0.644949	-0.2352	0.0156006	2.317008e-51	-0.125851	0.273248	0.645103	0.431096	11	-0.661417	0.409715	0.881746	0.516119	1.50639	0.882(0.516,1.506)	0.922592
	SeqId_17702_53	2	UGT1A1	233760270	rs6742078	2	233763993	T	G	0.297546	0.0160381	0.0362296	0.657998	-0.2225	0.008466	3.1132e-152	-0.0720812	0.162853	0.658044	0.544732	20	-0.391273	0.247111	0.930455	0.676195	1.28032	0.93(0.676,1.28)	0.922592
	SeqId_13669_6	4	FGFR3	1793293	rs798722	4	1698137	A	G	0.291411	-0.0170898	0.0389871	0.661136	-0.1701	0.00923594	9.565892e-76	0.100469	0.229266	0.661226	0.948216	20	-0.348892	0.54983	1.10569	0.705469	1.73296	1.106(0.705,1.733)	0.922592
	SeqId_3488_64	11	CAT	34438934	rs769218	11	34449132	A	G	0.217791	-0.017941	0.0410798	0.662303	-0.212	0.00963714	2.994080e-107	0.0846274	0.193811	0.662365	0.367121	20	-0.295242	0.464497	1.08831	0.744351	1.59121	1.088(0.744,1.591)	0.922592
	SeqId_19488_1	5	PDCD6	271621	rs341271	5	107342	G	C	0.0817996	0.0294236	0.0679479	0.664991	-0.1372	0.0153532	4.026999e-19	-0.214458	0.495828	0.66536	0.113607	15	-1.18628	0.757365	0.806979	0.305355	2.13265	0.807(0.305,2.133)	0.922592
	SeqId_3852_19	19	DNAJB1	14514769	rs11085896	19	14541074	C	A	0.629857	0.0154482	0.0362425	0.669929	-0.0523	0.00820685	1.857003e-10	-0.295377	0.694522	0.670622	0.182015	19	-1.65664	1.06589	0.744251	0.190779	2.90341	0.744(0.191,2.903)	0.922592
	SeqId_15414_316	11	LDHA	18394560	rs74800709	11	18553766	C	T	0.0644172	-0.0378104	0.0887329	0.670024	-0.0696	0.0122105	1.197998e-08	0.543252	1.27845	0.670889	0.727476	7	-1.96251	3.04901	1.7216	0.140505	21.0945	1.722(0.141,21.095)	0.922592
	SeqId_11257_1	4	QDPR	17460261	rs35216955	4	17525490	G	A	0.231084	-0.0180715	0.0430683	0.674776	-0.4201	0.007601	0	0.0430173	0.102522	0.674785	0.921403	20	-0.157926	0.24396	1.04396	0.853913	1.27629	1.044(0.854,1.276)	0.922592
	SeqId_17794_6	16	PMM2	8788823	rs3826198	16	8812682	A	C	0.782209	0.0176115	0.0422259	0.67662	-0.1686	0.00992421	9.947113e-65	-0.104458	0.250525	0.676712	0.379366	20	-0.595487	0.386571	0.900813	0.551294	1.47192	0.901(0.551,1.472)	0.922592
	SeqId_2837_3	7	MET	116672196	rs10435378	7	116785439	A	G	0.556237	-0.0142552	0.034627	0.680576	0.1309	0.0083651	3.410052e-55	-0.108901	0.264622	0.68068	0.535774	20	-0.62756	0.409758	0.896819	0.533893	1.50645	0.897(0.534,1.506)	0.922592
	SeqId_19437_61	6	VEGFA	43770184	rs6921438	6	43957870	A	G	0.466258	-0.0142479	0.0347826	0.682079	-0.5877	0.006326	0.000000e+00	0.0242435	0.0591848	0.682082	0.523081	20	-0.0917587	0.140246	1.02454	0.912325	1.15056	1.025(0.912,1.151)	0.922592
	SeqId_4867_15	6	VEGFA	43770184	rs6921438	6	43957870	A	G	0.466258	-0.0142479	0.0347826	0.682079	-0.5496	0.006402	0.000000e+00	0.0259241	0.0632878	0.682083	0.535425	20	-0.09812	0.149968	1.02626	0.90654	1.1618	1.026(0.907,1.162)	0.922592
	SeqId_2597_8	6	VEGFA	43770184	rs6921438	6	43957870	A	G	0.466258	-0.0142479	0.0347826	0.682079	-0.2976	0.008161	3.820562e-291	0.047876	0.116884	0.682098	0.43442	20	-0.181217	0.276969	1.04904	0.834255	1.31913	1.049(0.834,1.319)	0.922592
	SeqId_5509_7	4	EGF	109912883	rs4698801	4	109961320	A	C	0.332311	-0.0137543	0.0364267	0.705737	0.1074	0.00852581	2.192012e-36	-0.128066	0.339321	0.705863	0.0133002	20	-0.793135	0.537003	0.879795	0.452424	1.71087	0.88(0.452,1.711)	0.922592
	SeqId_11540_37	6	FOXO3	108559835	rs3813498	6	108622962	T	C	0.777096	0.0158709	0.0434409	0.714854	-0.0634	0.0103729	9.835014e-10	-0.25033	0.68641	0.71534	0.713085	20	-1.59569	1.09503	0.778544	0.202768	2.98928	0.779(0.203,2.989)	0.922592
	SeqId_11308_8	1	CREB3L4	153967534	rs6671362	1	153971312	G	A	0.47955	0.0127446	0.0350514	0.716159	0.1992	0.00801636	2.637976e-136	0.0639788	0.17598	0.716188	0.979725	20	-0.280942	0.4089	1.06607	0.755072	1.50516	1.066(0.755,1.505)	0.922592
	SeqId_3419_49	4	CAMK2D	113418054	rs6836139	4	113749800	C	T	0.44683	0.0127121	0.0351289	0.71745	0.0439	0.00797027	3.629992e-08	0.289568	0.801929	0.718032	0.996497	12	-1.28221	1.86135	1.33585	0.277423	6.43241	1.336(0.277,6.432)	0.922592
	SeqId_6998_106	8	ASPH	61500556	rs6471964	8	61620137	T	G	0.192229	0.0158327	0.0446118	0.722664	-0.1233	0.0107478	1.821988e-30	-0.128408	0.361988	0.722791	0.329937	20	-0.837904	0.581088	0.879494	0.432616	1.78798	0.879(0.433,1.788)	0.922592
	SeqId_3391_10	7	PIK3CG	106865278	rs342294	7	106732176	C	T	0.440695	-0.0123276	0.0348025	0.723177	-0.0484	0.00816957	3.133996e-09	0.254702	0.720344	0.72365	0.686351	8	-1.15717	1.66658	1.29008	0.314374	5.29401	1.29(0.314,5.294)	0.922592
	SeqId_17515_6	21	HSPA13	14371115	rs2822638	21	14372785	T	C	0.765849	-0.013485	0.03875	0.72784	-0.1073	0.00962653	7.466035e-29	0.125676	0.361313	0.727967	0.813765	20	-0.582497	0.833849	1.13391	0.558502	2.30216	1.134(0.559,2.302)	0.922592
	SeqId_3050_7	12	VWF	5948877	rs2283335	12	6048228	C	T	0.365031	0.0125654	0.0362393	0.728792	0.1099	0.00815269	2.045018e-41	0.114335	0.329857	0.728878	0.206863	20	-0.532185	0.760855	1.12113	0.58732	2.1401	1.121(0.587,2.14)	0.922592
	SeqId_4342_10	19	ICAM1	10271093	rs5498	19	10285007	G	A	0.464213	0.011679	0.0344869	0.734874	-1.1399	0.004209	0	-0.0102456	0.0302544	0.734874	0.104922	20	-0.0695442	0.049053	0.989807	0.932819	1.05028	0.99(0.933,1.05)	0.922592
	SeqId_4278_14	17	P4HB	81843159	rs62079523	17	82394427	A	G	0.323108	-0.0124764	0.0371813	0.737206	0.1273	0.00834239	1.425007e-52	-0.0980078	0.292147	0.737267	0.197261	20	-0.670616	0.4746	0.906642	0.511394	1.60737	0.907(0.511,1.607)	0.922592
	SeqId_8458_111	4	SNCA	89700345	rs2119785	4	89915368	C	A	0.468303	0.0114614	0.0346662	0.740931	0.0461	0.00806823	1.104997e-08	0.24862	0.753237	0.741348	0.160687	20	-1.22772	1.72496	1.28225	0.292958	5.61232	1.282(0.293,5.612)	0.922592
	SeqId_8006_12	10	DNAJB12	72332830	rs9416018	10	72340884	A	G	0.578732	-0.0122668	0.0373496	0.742586	-0.0833	0.00866589	7.087972e-22	0.14726	0.448636	0.742731	0.475934	20	-0.732067	1.02659	1.15866	0.480914	2.79152	1.159(0.481,2.792)	0.922592
	SeqId_2654_19	12	TNFRSF1A	6328757	rs1800693	12	6330843	C	T	0.427403	0.0113273	0.0347376	0.744364	-0.0774	0.00850447	8.942049e-20	-0.146347	0.449095	0.744522	0.855183	11	-1.02657	0.733879	0.863858	0.358232	2.08315	0.864(0.358,2.083)	0.922592
	SeqId_11140_56	17	COL1A1	50184101	rs7216539	17	50097073	C	T	0.93865	0.0287577	0.0924607	0.755781	0.1335	0.0149281	3.792017e-19	0.215413	0.693008	0.755924	0.739294	6	-1.14288	1.57371	1.24037	0.318898	4.82451	1.24(0.319,4.825)	0.922592
	SeqId_8345_27	1	GPX7	52602371	rs7527068	1	52610953	G	A	0.845603	-0.0137166	0.0451532	0.761297	-0.7111	0.009407	0	0.0192892	0.0634982	0.761299	0.394015	20	-0.105167	0.143746	1.01948	0.900174	1.15459	1.019(0.9,1.155)	0.922592
	SeqId_4962_52	10	CDNF	14819245	rs55884544	10	14815530	G	A	0.132924	0.0155742	0.0521848	0.765365	0.2034	0.0125238	2.585981e-59	0.0765691	0.256606	0.765404	0.917503	20	-0.426379	0.579517	1.07958	0.652869	1.78518	1.08(0.653,1.785)	0.922592
	SeqId_4374_45	19	GDF15	18374731	rs16982345	19	18389912	A	G	0.252556	0.0116364	0.041153	0.777362	0.4507	0.007723	0	0.0258184	0.0913102	0.777364	0.610648	20	-0.15315	0.204786	1.02615	0.858001	1.22726	1.026(0.858,1.227)	0.922592
	SeqId_16918_198	4	TLR3	186068911	rs3775291	4	186082920	T	C	0.321063	-0.010277	0.0375744	0.784462	-0.7045	0.006868	0	0.0145876	0.053335	0.784462	0.151017	20	-0.089949	0.119124	1.01469	0.913978	1.12651	1.015(0.914,1.127)	0.922592
	SeqId_6151_18	17	MAP2K3	21284672	rs8074866	17	21287215	T	C	0.340491	0.0108383	0.0400335	0.786598	-0.0483	0.00857712	1.788996e-08	-0.224396	0.829807	0.786838	0.742818	14	-1.85082	1.40203	0.798999	0.157109	4.06342	0.799(0.157,4.063)	0.922592
	SeqId_10714_7	17	ACE	63477061	rs4363	17	63497131	A	G	0.441718	-0.00939859	0.0352821	0.789944	-0.6254	0.005857	0	0.0150281	0.0564155	0.789944	0.791157	20	-0.0955463	0.125602	1.01514	0.908876	1.13383	1.015(0.909,1.134)	0.922592
	SeqId_3184_25	13	F7	113105788	rs6046	13	113118845	A	G	0.112474	0.013777	0.0532384	0.795806	-1.2451	0.009631	0	-0.0110649	0.0427584	0.795806	0.455848	20	-0.0948714	0.0727416	0.988996	0.90949	1.07545	0.989(0.909,1.075)	0.922592
	SeqId_14158_17	4	ANXA5	121667946	rs9995591	4	121694605	A	G	0.0674847	-0.0173327	0.0679774	0.79874	0.2632	0.0155671	3.964939e-64	-0.0658539	0.258302	0.798763	0.573085	20	-0.572126	0.440418	0.936268	0.564325	1.55336	0.936(0.564,1.553)	0.922592
	SeqId_2750_3	11	APOA1	116835751	rs5090	11	116823339	G	C	0.0572597	-0.0213707	0.0838517	0.798829	-0.3079	0.0184917	2.990975e-62	0.069408	0.272366	0.798852	0.433781	18	-0.464429	0.603245	1.07187	0.628494	1.82804	1.072(0.628,1.828)	0.922592
	SeqId_3831_21	10	PTEN	87862563	rs7079754	10	88115926	C	T	0.114519	-0.0163296	0.0641514	0.799072	0.0795	0.0133168	2.374002e-09	-0.205404	0.807669	0.799251	0.468355	4	-1.78844	1.37763	0.814318	0.167222	3.96548	0.814(0.167,3.965)	0.922592
	SeqId_3855_56	1	PRDX1	45510914	rs12047498	1	45488960	T	C	0.216769	-0.0104244	0.0414203	0.801294	0.1088	0.0095959	8.48901e-30	-0.0958121	0.380795	0.801342	0.0183507	16	-0.84217	0.650546	0.908635	0.430775	1.91659	0.909(0.431,1.917)	0.922592
	SeqId_10612_18	7	PLOD3	101205977	rs75090415	7	101152076	G	T	0.0470348	0.0243336	0.0974349	0.802787	-0.122	0.0189121	1.112e-10	-0.199456	0.799245	0.802931	0.508469	20	-1.76598	1.36706	0.819176	0.17102	3.92381	0.819(0.171,3.924)	0.922592
	SeqId_9322_15	11	RCN1	32091074	rs531576	11	32089877	A	G	0.139059	0.012381	0.0512013	0.808927	-0.1735	0.0115383	4.210956e-51	-0.0713604	0.295147	0.808951	0.986948	20	-0.649849	0.507128	0.931126	0.522125	1.66051	0.931(0.522,1.661)	0.922592
	SeqId_2864_2	15	MAP2K1	66386837	rs34591673	15	66364765	A	G	0.107362	-0.0146125	0.0615839	0.812442	0.1122	0.0162924	5.711988e-12	-0.130236	0.549202	0.812551	0.211894	16	-1.20667	0.9462	0.877888	0.299191	2.5759	0.878(0.299,2.576)	0.922592
	SeqId_15604_18	5	MAPK9	180233143	rs3763131	5	180307312	C	T	0.217791	-0.0097292	0.0430625	0.821254	0.1846	0.0100282	1.131e-75	-0.0527042	0.233292	0.821268	0.558464	20	-0.509957	0.404548	0.948661	0.600522	1.49863	0.949(0.601,1.499)	0.922592
	SeqId_4162_54	3	TF	133746040	rs8177245	3	133760386	G	A	0.339468	-0.00822857	0.0364445	0.82137	0.1451	0.00865787	4.842018e-63	-0.0567096	0.251191	0.821386	0.419386	20	-0.549044	0.435625	0.944868	0.577502	1.54593	0.945(0.578,1.546)	0.922592
	SeqId_3825_18	10	MAPK8	48306639	rs1997365	10	48299932	A	C	0.685072	-0.00811117	0.0364953	0.824117	0.0563	0.00888119	2.309004e-10	-0.144071	0.648628	0.824224	0.866206	20	-1.41538	1.12724	0.865826	0.242833	3.08712	0.866(0.243,3.087)	0.922592
	SeqId_4124_24	6	HSPA1A	31815543	rs28672722	6	32658760	T	G	0.263804	0.0122566	0.056511	0.828295	0.099	0.00880431	2.465002e-29	0.123804	0.570925	0.828327	0.0362186	20	-0.995209	1.24282	1.13179	0.369646	3.46536	1.132(0.37,3.465)	0.922592
	SeqId_17781_191	20	MAP1LC3A	34546854	rs6120675	20	34551066	C	T	0.490798	0.00757988	0.0350418	0.828746	0.0496	0.00816253	1.227998e-09	0.15282	0.706936	0.828853	0.472323	20	-1.23277	1.53841	1.16512	0.291483	4.6572	1.165(0.291,4.657)	0.922592
	SeqId_2771_35	7	IGFBP1	45888360	rs3828998	7	45889209	C	T	0.386503	0.00717137	0.0360177	0.842179	-0.0769	0.00814406	3.641018e-21	-0.0932558	0.468474	0.842214	0.7217	20	-1.01146	0.824953	0.91096	0.363686	2.28177	0.911(0.364,2.282)	0.931917
	SeqId_3474_19	15	THBS1	39581079	rs12906549	15	39501496	G	C	0.822086	-0.0082033	0.0435098	0.850454	-0.0598	0.0101723	4.134996e-09	0.137179	0.727963	0.85053	0.789819	20	-1.28963	1.56399	1.14703	0.275373	4.77783	1.147(0.275,4.778)	0.935583
	SeqId_5107_7	9	NOTCH1	136494433	rs9411207	9	136514099	T	C	0.393661	0.00716879	0.0414842	0.862803	0.0968	0.00883853	6.495966e-28	0.0740578	0.428609	0.862819	0.970812	20	-0.766016	0.914131	1.07687	0.464861	2.49461	1.077(0.465,2.495)	0.938196
	SeqId_19273_3	8	GSR	30678066	rs4733505	8	30695913	G	A	0.630879	-0.00646301	0.0377438	0.86404	0.113	0.00857819	1.256006e-39	-0.0571948	0.334044	0.864051	0.945202	20	-0.711921	0.597531	0.94441	0.490701	1.81763	0.944(0.491,1.818)	0.938196
	SeqId_8960_3	5	ERAP2	96875986	rs2910686	5	96916885	C	T	0.424335	0.00575712	0.0352199	0.870155	1.0603	0.003316	0	0.00542971	0.0332169	0.870155	0.000585065	20	-0.0596754	0.0705348	1.00544	0.94207	1.07308	1.005(0.942,1.073)	0.938196
	SeqId_3640_14	4	LRPAP1	3503612	rs114634328	4	3499799	C	G	0.0480573	-0.0150941	0.0944018	0.872966	-0.3659	0.0238826	5.553009e-53	0.0412519	0.258013	0.872973	0.827106	15	-0.464454	0.546957	1.04211	0.628478	1.72799	1.042(0.628,1.728)	0.938196
	SeqId_10346_5	17	STAT3	42313324	rs4796791	17	42378745	C	T	0.629857	-0.00484155	0.037459	0.897161	0.1541	0.00823726	4.285941e-78	-0.0314182	0.243088	0.897163	0.445042	20	-0.507871	0.445034	0.96907	0.601776	1.56054	0.969(0.602,1.561)	0.958683
	SeqId_3285_23	12	C1R	7080214	rs11064385	12	6786059	A	G	0.622699	-0.0034515	0.037523	0.926711	-0.0541	0.00837197	1.033001e-10	0.0637985	0.693657	0.926719	0.915581	12	-1.29577	1.42337	1.06588	0.273687	4.15107	1.066(0.274,4.151)	0.977527
	SeqId_6393_63	12	HSP90B1	103930107	rs1165693	12	103946426	A	G	0.338446	-0.00339203	0.0369429	0.926843	0.7214	0.006206	0	-0.004702	0.05121	0.926843	0.958682	20	-0.105074	0.0956696	0.995309	0.900258	1.1004	0.995(0.9,1.1)	0.977527
	SeqId_9223_11	3	MANF	51385291	rs1383251	3	51329409	A	G	0.877301	-0.00401337	0.0480754	0.933469	0.0864	0.0118499	3.071999e-13	-0.046451	0.556465	0.933474	0.674012	20	-1.13712	1.04422	0.954611	0.320741	2.84118	0.955(0.321,2.841)	0.977527
	SeqId_6909_40	14	MGAT2	49620799	rs7519	14	49621035	C	T	0.526585	-0.00283834	0.035186	0.935707	0.131	0.00804421	1.261012e-59	-0.0216667	0.268599	0.935708	0.645296	20	-0.548121	0.504787	0.978566	0.578035	1.65663	0.979(0.578,1.657)	0.977527
	SeqId_13992_12	17	NSF	46590669	rs2696466	17	46212466	G	A	0.436605	0.00342678	0.0525538	0.94801	0.1046	0.00809853	3.660001e-38	0.0327609	0.502433	0.948011	0.283457	8	-0.952008	1.01753	1.0333	0.385965	2.76635	1.033(0.386,2.766)	0.983697
	SeqId_2677_1	7	EGFR	55019017	rs13244925	7	55124563	C	A	0.52863	0.00205962	0.0348166	0.952828	-0.102	0.00832294	1.573991e-34	-0.0201923	0.341343	0.952828	0.194589	20	-0.689225	0.64884	0.98001	0.501965	1.91332	0.98(0.502,1.913)	0.983697
	SeqId_10396_6	1	MCL1	150560895	rs28744536	1	150564740	C	G	0.0756646	0.00304671	0.0570284	0.957394	-0.1658	0.020471	5.529985e-16	-0.0183758	0.343966	0.957395	0.0844299	9	-0.692549	0.655798	0.981792	0.500299	1.92668	0.982(0.5,1.927)	0.983697
	SeqId_3580_25	14	SERPINA1	94376747	rs1243167	14	94375304	A	G	0.208589	0.000908757	0.0434864	0.983327	0.4096	0.007072	0.000000e+00	0.00221864	0.106168	0.983327	0.128148	20	-0.205871	0.210308	1.00222	0.813938	1.23406	1.002(0.814,1.234)	0.994144
	SeqId_9394_19	8	CPQ	96645242	rs7813310	8	96792913	G	A	0.916155	-0.000981259	0.0650758	0.987969	0.4935	0.016015	1.657115e-208	-0.00198837	0.131866	0.987969	0.00430802	20	-0.260446	0.256469	0.998014	0.770708	1.29236	0.998(0.771,1.292)	0.994144
	SeqId_12494_99	16	GABARAPL2	75566375	rs16975847	16	75555692	A	G	0.0961145	0.000654232	0.0631016	0.991728	-0.1307	0.0123301	2.977992e-26	-0.0050056	0.482797	0.991728	0.486294	20	-0.951288	0.941277	0.995007	0.386243	2.56325	0.995(0.386,2.563)	0.994144
	SeqId_11177_16	12	KRT5	52514575	rs641615	12	52519125	T	G	0.281186	0.000431999	0.0418135	0.991757	-0.1558	0.00941806	1.808018e-61	-0.00277278	0.268379	0.991757	0.648094	20	-0.528796	0.52325	0.997231	0.589314	1.6875	0.997(0.589,1.688)	0.994144
	SeqId_2743_5	7	SHH	155799980	rs10225292	7	156380544	C	T	0.444785	-0.00025815	0.0351757	0.994144	-0.0928	0.00873078	2.183014e-26	0.00278179	0.379049	0.994144	0.853953	20	-0.740154	0.745718	1.00279	0.47704	2.10795	1.003(0.477,2.108)	0.994144
